# Supplementary figures and images for: Full-length cDNA sequence analysis of 85 avian leukosis virus subgroup J strains isolated from chickens in China during the years 1988–2018: coexistence of 2 extremely different clusters that are highly dependent upon either the host genetic background or the geographic location
Source: PubMed Central journal article supplement — Poult Sci. 2020 May 6;99(7):3469–80. doi: 10.1016/j.psj.2020.04.023 (PMC7597930; doi:10.1016/j.psj.2020.04.023), 2020-05-06

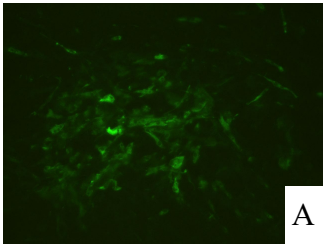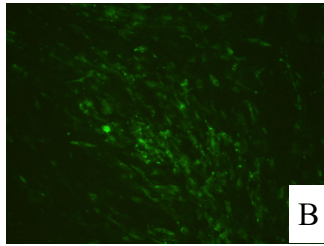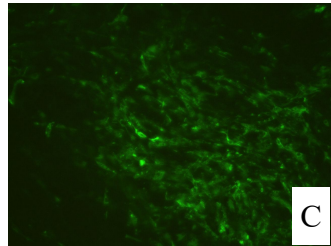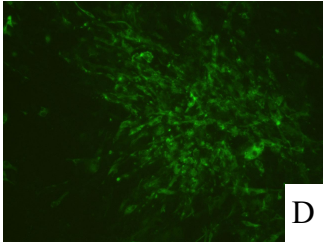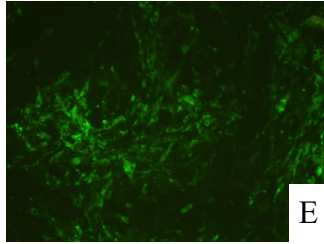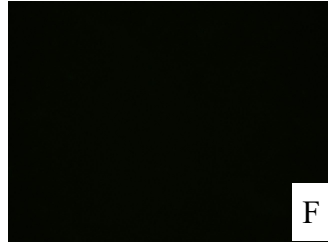

Supplement: mmc2.pdf [file mmc2.pdf]

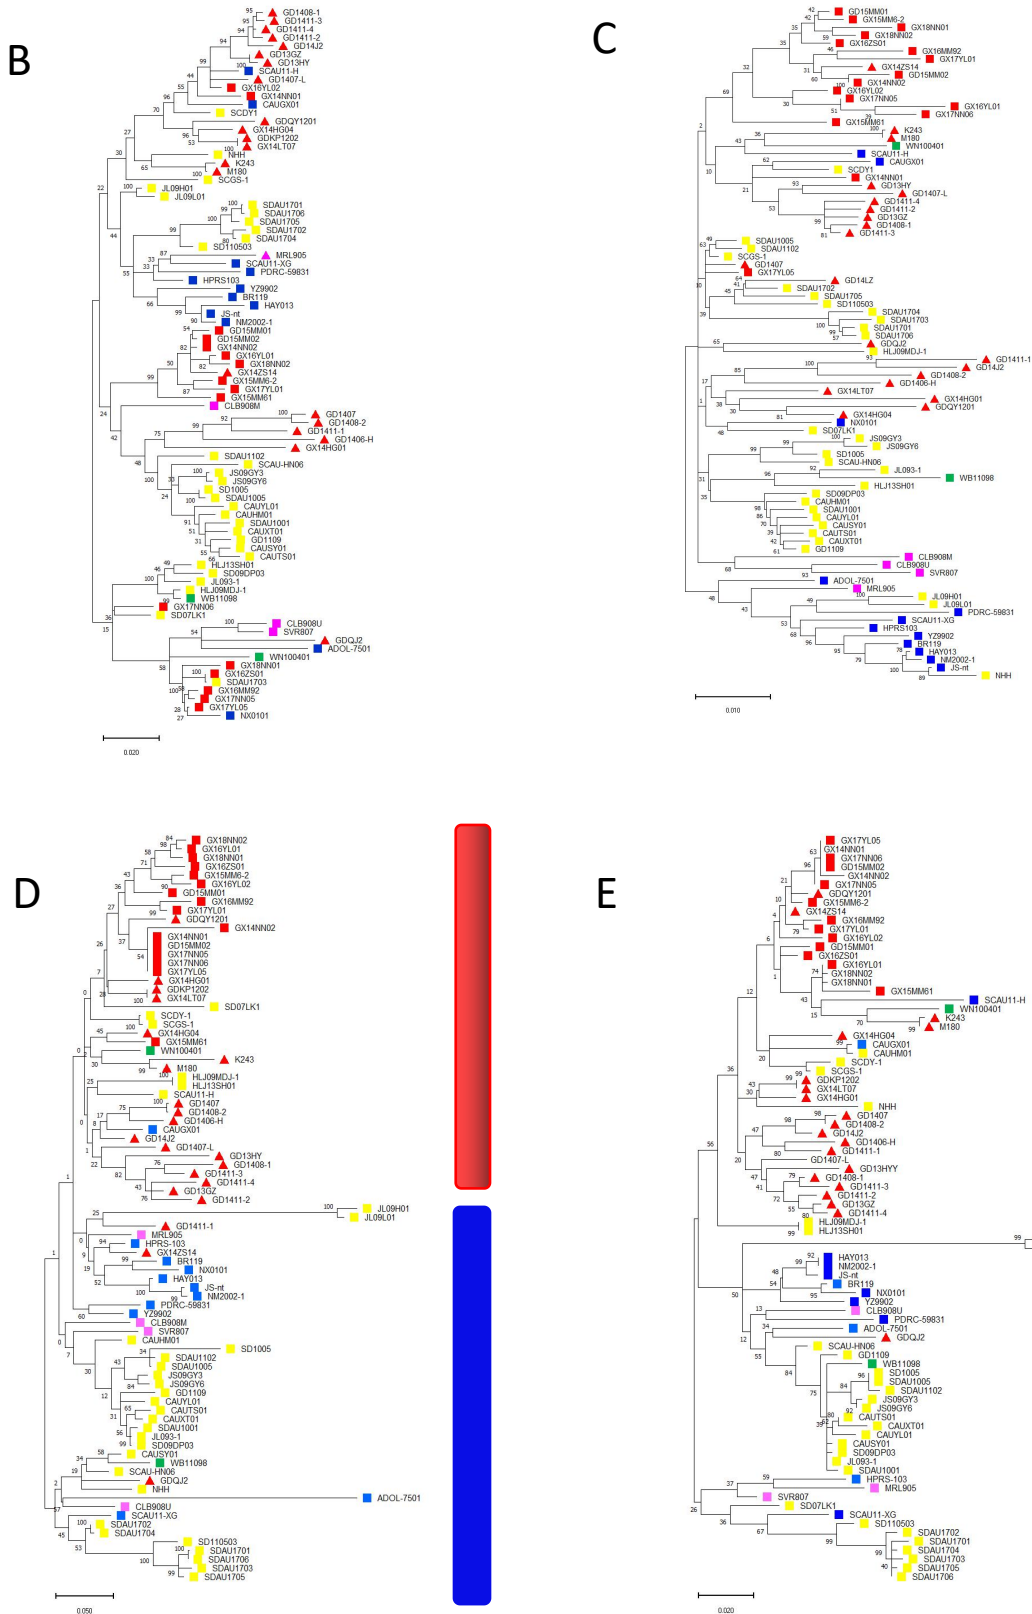

Fig. S2

Supplement: mmc3.pdf [file mmc3.pdf]
